# Supplementary material for: Creating a national scale debris flow susceptibility model for Great Britain: a GIS-based heuristic approach
Source: Copernicus journal article supplement (doi:10.5194/nhess-2019-54), 2019-03-12
Supplement: Supplementary file [file nhess-2019-54-RC2-supplement.pdf]

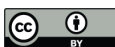

## 1 **Creating a national scale debris flow susceptibility model for Great Britain:** 2 **a GIS-based heuristic approach**

3 Emma J. Bee<sup>1</sup>, Claire Dashwood<sup>1</sup>, Catherine Pennington<sup>1</sup>, Roxana L. Ciurean<sup>1</sup> and Katy Lee<sup>1</sup>

4 <sup>1</sup> British Geological Survey, Environmental Science Centre, Nicker Hill, Keyworth, UK.

5 *Correspondence to:* BGS Enquiries ([enquires@bgs.ac.uk](mailto:enquires@bgs.ac.uk))

6 **Abstract.** Debris flows in Great Britain have caused damage to transport infrastructure, buildings, and disruption  
7 to businesses and communities. This study describes a GIS-based heuristic model developed by the British  
8 Geological Survey (BGS) to produce a national scale spatial assessment of debris flow susceptibility for Great  
9 Britain. The model provides information on the potential for debris flow occurrence using properties and  
10 characteristics of geological materials (permeability, material availability and characteristics when weathered),  
11 slope angle and proximity to stream channels as indicators of susceptibility. Building on existing knowledge, the  
12 model takes into account the presence or absence of glacial scouring. As determined by the team of geologists  
13 and geomorphologists, the model ranks the availability of debris material and slope as the two dominant factors  
14 important for potential debris flow initiation, however it also considers other factors such as geological controls  
15 on infiltration. The resultant model shows that over 90 % of the mapped debris flows in the BGS inventory  
16 occurred in areas with the highest potential for instability and approximately 6 % were attributed to areas where  
17 the model suggested that debris flows are unlikely or not thought to occur. Model validation in the Cairngorm  
18 Mountains indicated a better performance, with 93.50 % in the former and less than 3 % in the latter category.  
19 Although the quality of the input datasets and selected methodological approach bear limitations and introduce a  
20 number of uncertainties, overall, the proposed susceptibility model performs better than previous attempts,  
21 representing a useful tool in the hands of policy-makers, developers and engineers to support regional or national  
22 scale development action plans and disaster risk reduction strategies.

### 23 **1 Introduction**

24 The term debris flow refers to the rapid downslope flow of poorly-sorted debris mixed with water (Ballantyne  
25 2004). Debris flows are described by (Hungr et al. 2014) as “*very rapid to extremely rapid surging flows of*  
26 *saturated debris in a steep channel*”. They are a widespread phenomenon in mountainous terrain and are distinct  
27 from other types of landslides, as they can occur periodically on established paths, usually gullies and first- or  
28 second-order drainage channels and are characterised by “*strong entrainment of material and water from the flow*  
29 *path*” (Hungr et al. 2014). Debris flows consist of three main parts: source area, track and depositional area. Source  
30 areas may be initiated by a slide, debris avalanche or rock fall from a steep bank, or by spontaneous instability of  
31 the steep stream bed (Hungr et al. 2014). Irrespective of the mode of flow initiation, debris flows are generated  
32 when a build-up of pore water pressures in unconsolidated sediments causes a reduction in the shear resistance,  
33 leading to failure and sediment flow (Ballantyne, 2004). Debris flows tend to follow long, narrow tracks. The  
34 upper, erosional section of the flow consists of a gully that is continued downslope by parallel levées of dominantly  
35 coarse debris that enclose the track of the flow (Fig. 1) and often terminate downslope in one or more lobes of  
36 bouldery debris (Ballantyne 2004). Characteristic morphological features used to distinguish debris flow fans  
37 from other sediment-laden process depositional areas include: high slope angle of the fan, very large individual

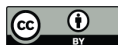

1 particles, coarse levées and boulder trains, signs of impact loading on obstacles, U-shaped eroded channels and  
2 steep, debris-loaded channels upstream (Hungr et al. 2014).  
3

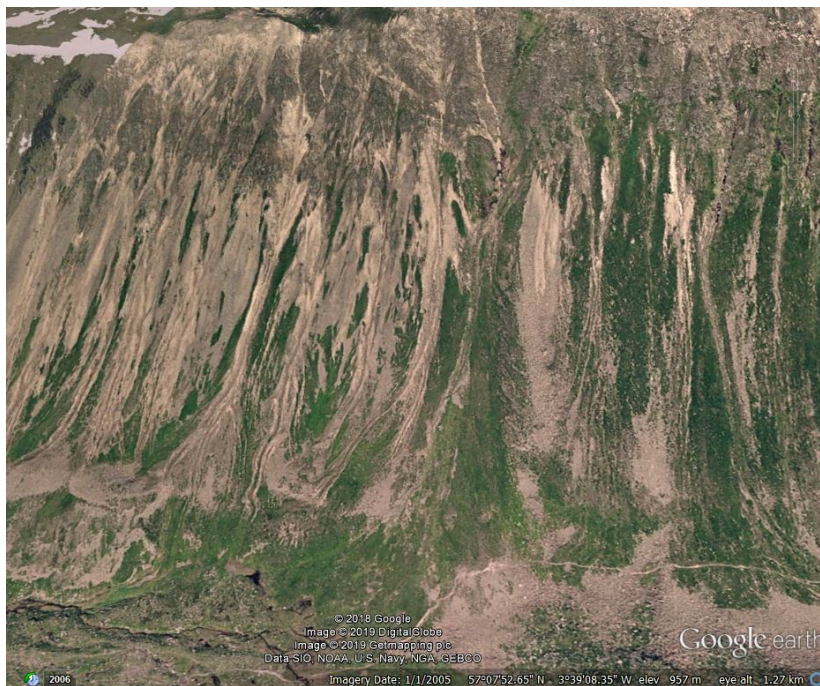

4  
5 **Figure 1: Debris flows in Lairig Grhu, Cairngorms, Scotland with distinct levée features (Image Source: Google Earth.**  
6 **Digital Globe 2019)**

7  
8 Debris flows in Great Britain are most commonly found in upland Scotland but also in parts of Wales and the  
9 Lake District, England. According to Nettleton et al. (2005), Ballantyne (2004), and Cruden (1996) there are two  
10 types of debris flow in Great Britain: hillslope or open slope debris flows and valley-confined or channelised  
11 debris flows. *Hillslope or open slope debris flows* (Fig. 2a) form their own path down the valley slopes as tracks  
12 or sheets and deposit material on the lower slopes where the gradient shallows. *Valley-confined or channelised*  
13 *debris flows* (Fig. 2b) originate in bedrock gullies and are confined for at least part of their length along the gully  
14 floor. The flows have the consistence equivalent to that of wet concrete and can be fronted by a boulder  
15 concentration or 'head'. The two categories are transitional; many valley-confined flows debouch on to open  
16 ground in their lower reaches, and hillslope debris flows often follow shallow gullies cut in valley-side drift, talus  
17 or regolith. Most debris flows in Great Britain occur following a period of high magnitude precipitation events.  
18

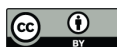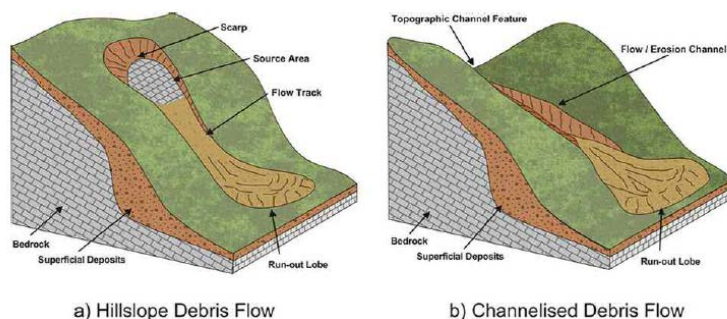

1  
2 **Figure 2: Hillslope (a) and channelised (b) debris flow (Image source: Nettleton et al. 2005)**

3  
4 **1.1 Rationale for research**

5 Debris flows are potentially very destructive as they can cause significant erosion of the substrates over which  
6 they flow, thereby increasing their sediment charge and further increasing their erosive capabilities (Nettleton et  
7 al. 2005). Debris flows can lead to financial loss for anyone involved in the ownership or management of property,  
8 including developers, householders, loss adjusters, surveyors or local government. These costs could include  
9 increased insurance premiums, depressed house prices and, in some cases, engineering works to stabilise land or  
10 property.

11 In Great Britain, the Scottish road and rail networks are recurrently affected by debris flows. In August 2004,  
12 two debris flows intersected the A85 in Glen Ogle, north of Lochearnhead, Stirlingshire. Fifty seven people were  
13 stranded on the roadway between two debris flows with a cumulative volume of approximately 15,000 m<sup>3</sup> (Winter  
14 et al. 2014) and either left the scene on foot or were rescued by helicopter (Milne et al. 2009). The A85, which  
15 normally carries up to 5,600 vehicles per day, was closed for four days (Winter et al. 2006). The most widely  
16 reported location in Great Britain for debris flow impact on a strategic road is the A83 'Rest and Be Thankful'  
17 Pass (British Geological Survey 2009). Event magnitudes here are generally small, ranging between 200 and  
18 1,000 m<sup>3</sup> in volume, however debris flows have occurred at least on an annual basis over the last 25 - 30 years  
19 (Winter et al. 2014). The road is regularly closed in both directions resulting in a 55 mile diversion with significant  
20 regional economic impact that is regularly reported in the media. Postance et al. (2017) calculated that historic  
21 estimates of the economic impact of the 2007 A83 'Rest and Be Thankful' debris flow event totalled £1.2 million  
22 over a 15 day closure, 60 % greater than previous estimates. In 2011 and 2014, wig-wag warning signs (Winter  
23 et al. 2013, Winter and Shearer 2017) and ten bespoke debris flow barriers, respectively, were installed to warn  
24 drivers about the increased likelihood of debris flows (Maccaferri 2014).

25 The potential risk to people, business and properties outlined in the England and Wales Planning Policy  
26 Guidance Note 14 (PPG14) and associated annexes (Department of the Environment 1990) were the main drivers  
27 for the development of British Geological Survey's (BGS) slope instability datasets, including the current Debris  
28 Flow Susceptibility Model (DFSM). Although this guidance was intended for England and Wales only, the  
29 principles are relevant to Scotland as well (Jones and Lee 1994). PPG14 has now been replaced by the National  
30 Planning Policy Framework, 2012 (Department for Communities and Local Government 2012), however,  
31 unstable land still requires consideration and PPG14 remains the only document widely available that gives any

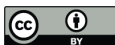

1 guidance for planning. To overcome this limitation and respond to the needs of asset managers, decision-makers  
2 and practitioners, a methodology was developed to assess debris flow susceptibility spatially at national scale.  
3 **The aim** was to identify potential debris flow initiation areas and serve as an indication where further, more  
4 detailed studies should be carried out.

5 Debris flow **hazard** assessment methodologies vary widely depending on the purpose of the analysis, the extent  
6 of the study area and data availability. They are often divided into two phases 1) the identification of potential  
7 sources or initiation areas and, 2) the estimation of the runout, the former being the focus of the present study.  
8 While statistical models for potential source identification are based on extensive inventories of past events  
9 (Blahut et al. 2010, Carrara et al. 2008), deterministic approaches consider physical characteristics of the process  
10 and are thus transferable to any site (Iovine et al. 2003) but are **high data demanding and require calibration**, which  
11 makes them rarely feasible for national scale applications. Geographical Information System (GIS) based  
12 statistical landslide susceptibility assessments are focused, more often than not, on the tool rather than the input  
13 data, and do not distinguish between landslide type, resulting in an oversimplification of the landslide controlling  
14 factors (Van Westen et al., 2006). Heuristic methods, on the other hand, link a variety of environmental factors  
15 contributing to possible slope instabilities to expert knowledge of the area and can be adapted to any scale. In this  
16 study, we opted for the latter approach, as it allows for the combination of uniform geologic datasets available at  
17 a broad scale with an in-depth local expert knowledge.

18 As to the scale of analysis, most debris flow susceptibility assessments are carried out at local, catchment or  
19 regional scales (e.g. Hurlimann et al. 2008, Kappes et al. 2011, Skinner 2013, Blais-Stevens and Behnia 2016).  
20 Few countries or jurisdictions have developed guidelines on how to map and assess debris flow **hazard**, with the  
21 exception of Austria and Switzerland, who have legislated debris flow management since 1975 (Jakob 2005), and  
22 Scotland, since 2005 (Winter et al. 2005).

23 In Great Britain, studies have concentrated on debris flow susceptibility modelling and **hazard ranking** in  
24 Scotland only. The first regional debris flow susceptibility assessment was the Scottish Road Network Landslides  
25 Study (Winter et al. 2005). This was commissioned by the Scottish Executive and conducted by a multidisciplinary  
26 working group in response to debris flow events in 2004 that impacted Scotland's road network substantially. A  
27 pan-Scotland susceptibility assessment was carried out within a GIS environment (Harrison et al. 2006), which  
28 considered availability of material, water conditions, vegetation and land cover, proximity of stream channels and  
29 slope angle as preconditioning factors. The assessment was calibrated by the working group and then interpreted  
30 to derive **hazard and hazard-ranking** information for the Scottish road network (Winter et al. 2013). Areas of  
31 England and Wales also prone to debris flows, such as the Lake District and Snowdonia National Park, were  
32 excluded from this assessment. When the methodology used in the Scottish Road Network Landslide Study was  
33 applied to the rest of Great Britain, it was apparent that the model was over sensitive in many areas where debris  
34 flows are not common. These erroneous results led to its reassessment for application at the national scale. The  
35 subsequent availability of the national Soil Parent Material Map produced by BGS (Lawley et al. 2009) enabled  
36 the use of more detailed information to determine the character and availability of regolith than in the previous  
37 2005 assessment.



## 2 Data and methods

In order to develop a national scale debris flow susceptibility model for Great Britain, the characterisation of the geological and geomorphological factors that increase the likelihood of debris flow occurrence and their potential to be represented spatially within a GIS was explored. To assess the performance of the model, aerial photographs and LiDAR imagery were used to create an inventory of over 2000 debris flows. The spatial location of the perceived debris flow initiation area was represented by a point recorded in GIS and subsequently compared with the susceptibility model pixel classification at that location. The model accuracy was assessed using a frequency ratio plot and the Receiver Operating Characteristics (ROC) curve in a representative area for debris flow occurrence. ROC curves are commonly used to evaluate the performance of binary classifiers i.e. presence or absence of landslides. Since landslide inventories are rarely complete, the tool was tested in an area where most debris flows had been mapped. The methodological workflow is illustrated in Fig. 3 and explained in the following sections.

13

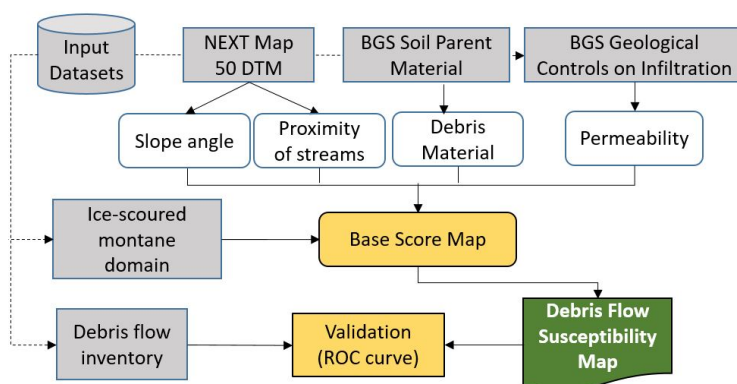

14

15 **Figure 3: Methodological workflow.**

### 16 2.1 Factors that increase the likelihood of debris flows

17 An analysis of a number of debris flow susceptibility maps by Carrara *et al.* (2008) showed that, despite a  
18 large number of variables being used, only a few had a strong discriminant power: high slope angle, pasture or no  
19 vegetation cover, availability of detrital material and active erosional processes. This echoes previous research,  
20 undertaken as part of a study into debris flows affecting the Scottish transport network (Winter *et al.* 2005), that  
21 identified five main factors to be considered when determining the hazard potential for debris flows:

- 22 1. availability of debris material
- 23 2. hydrogeological conditions
- 24 3. slope angle
- 25 4. proximity of stream channels
- 26 5. land use.

27 All above factors were considered in creating the BGS DFSM for Great Britain (version 6.0), with the  
28 exception of land use. Whilst vegetation may have a beneficial effect on slope stability (e.g. intercepting rainfall,  
29 removing soil moisture and reinforcement of the ground through root networks) the amount of stabilisation will

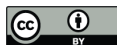

1 vary with the type of vegetation and the season. Experience working on a number of projects with the Forestry  
2 Commission highlighted the fact that, even though an area may be designated as woodland, it is not always  
3 completely planted and forest roads and firebreaks may increase the potential for debris flows. For this reason,  
4 the fact that land use changes over time, and the scale to which the model was being developed, the authors  
5 excluded land use from the model, focussing on the geological and morphological factors that contribute to debris  
6 flow initiation. It is recommended that local knowledge and up to date, detailed land use information is used by  
7 end users to support the modelling results.

## 8 **2.2 Predisposing morphological and geological factors**

9 For each of the factors that increase the likelihood of a debris flow occurring, a spatial dataset was created to  
10 indicate where these factors were most and least prominent. These factors are described in the following sections.

### 11 **2.2.1 Availability of Debris Material**

12 Research on debris flows in Scotland has shown that failures are most likely on slopes mantled by regolith or  
13 coarse-grained (cohesionless) superficial deposits with a sandy matrix (Ballantyne 2004). Granular materials are  
14 more susceptible to debris flows due to higher infiltration rates and greater potential for rapid increase in pore  
15 pressures during intense rainfall events (McMillan et al. 2005). The methodology adopted for assessing  
16 availability of material sought to classify geological materials according to texture and the characteristics of any  
17 weathering products (regolith) that may be mantling slopes and that could become involved in a debris flow.  
18 Formations prone to this include granite and sandstones as opposed to finer-grained schistose or extrusive igneous  
19 lithologies (Milne 2008).

20 In order to create a spatial data layer that classifies geology based on its susceptibility to debris flow  
21 occurrence, the BGS Soil-Parent Material Database (version 6) (Lawley et al. 2009) was analysed. A 'soil parent  
22 material' is a geological deposit over, and within which, a soil develops (Lawley et al. 2009). Typically, the  
23 parent material is the first recognisable geological deposit encountered when excavating beneath the soil layer. It  
24 represents the very-near-surface geology. In general, the geological deposits closer to the ground surface are the  
25 most weathered, whilst the deeper deposits are less so. Soil parent materials play a vital role in determining soil  
26 type as their characteristics control three primary properties of their overlying soils: chemistry, texture and  
27 permeability-porosity (drainage). The latter two are key controls of the propensity of a material to fail as a debris  
28 flow. A GIS based logical decision-tree algorithm was developed, using expert knowledge, to determine the  
29 propensity, on a scale from 1 (low susceptibility) to 10 (high susceptibility), of each soil-parent material to fail as  
30 a debris flow. Thickness of material (and therefore source availability) was inferred by expert geologists through  
31 this scoring process. The algorithm considered the substrate of the geological material (i.e. whether it was bedrock,  
32 superficial or a surficial deposit), its origin (i.e. igneous, sedimentary or metamorphic) and the parent-materials  
33 strength characteristics when weathered to produce a map showing the propensity for the parent material at any  
34 given location, to fail as a debris flow (Fig. 4).

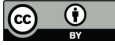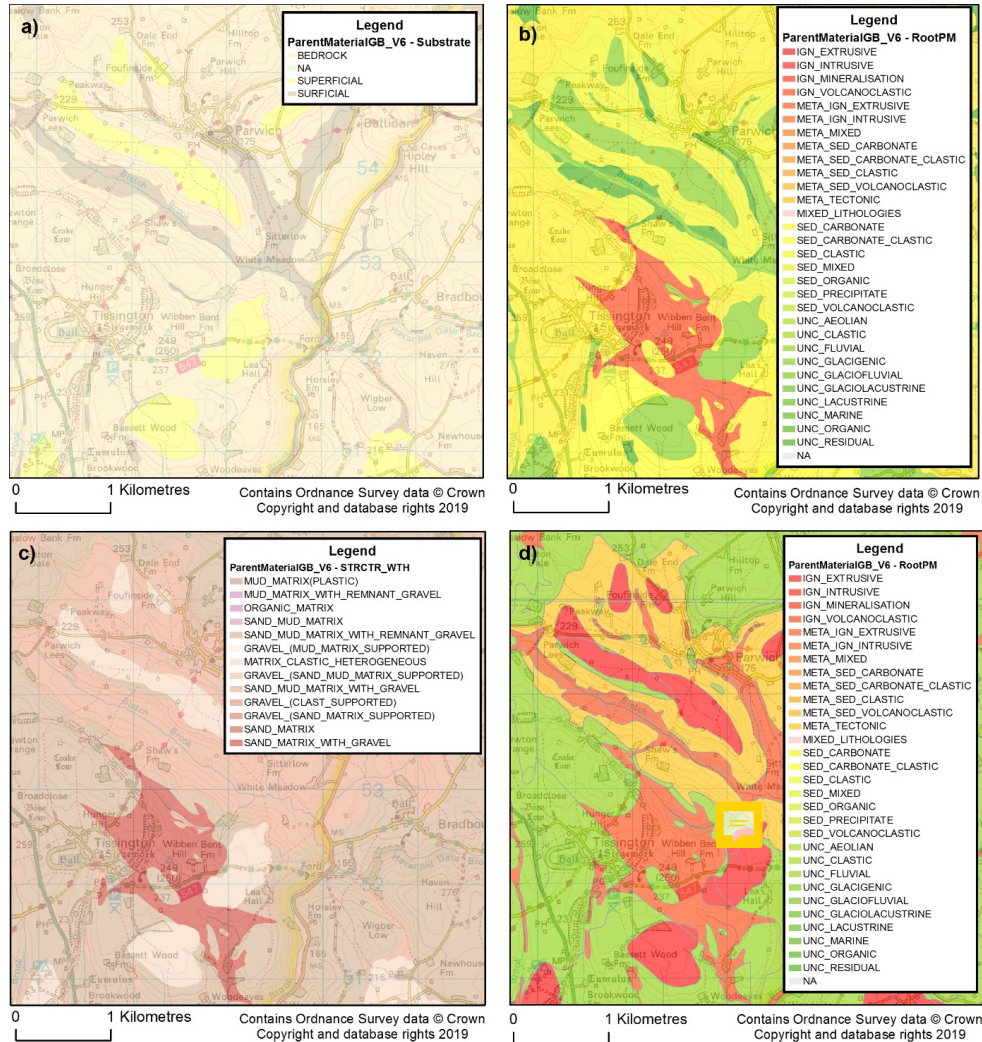

1  
 2

3 **Figure 4: Excerpt of the Soil–Parent Material Spatial Database, when coded to reflect a) substrate b) origin of parent**  
 4 **material and c) characteristics of material when weathered. d) The propensity of the material to fail as a debris flow**  
 5 **based on expert judgement.**

6 **2.2.2 Hydrological conditions (Permeability)**

7 **Debris flows are usually triggered by intense precipitation events.** Harrison et al. (2006) used two criteria when  
 8 determining whether a material was more or less susceptible to debris flow occurrence due to its hydrogeological  
 9 characteristics: a) the ability of water, as rainfall or overland flow, to infiltrate a potentially mobile deposit  
 10 (*permeability of the deposit*) and b) the ability of water to remain within the deposit to an extent where pore water  
 11 pressures can build to a level where the shear strength is sufficiently reduced to initiate failure (*permeability of*  
 12 *the underlying material*).



1 If a potentially mobile deposit is permeable but the underlying deposit is of a more impermeable nature,  
 2 infiltration of water will be impeded and this can lead to an increase in pore water pressure, subsequent lowering  
 3 of shear strength and potential failure. Conversely, if the underlying material is permeable, water flow will not be  
 4 impeded and a rapid increase in pore water pressures during an intense rainfall event is less likely.

5 In order to assess the geological factors controlling the hydrological conditions of the ground, BGS has  
 6 developed a national scale 'Geological Controls on infiltration dataset' (GCI) (Mee et al. 2016) for internal use.  
 7 This dataset gives an indication of how easily water can penetrate into the ground and describes whether: a)  
 8 infiltration is likely to be controlled by superficial or bedrock permeability, or both; and b) the infiltration  
 9 conditions are likely to be free draining, highly variable or poorly draining.

10 Infiltration rates are dependent on the thickness of any superficial deposits present, which in turn determines  
 11 whether infiltration is primarily controlled by the permeability of the bedrock or the superficial layers, or a  
 12 combination of the two. The GCI dataset is based partly on the methodology used to create the 'drainage' layer  
 13 of the Infiltration Sustainable Drainage Systems (SuDS) GIS dataset, where superficial and bedrock lithologies  
 14 are scored from 1 to 3 according to their infiltration capacity (Dearden 2016, Dearden et al. 2013). The GCI dataset  
 15 is incorporated into the model by adapting the infiltration score to reflect their potential impact on controlling  
 16 debris flow occurrence (Table 1). The infiltration scores are then modified to reflect a 10-point scale, as indicated  
 17 in Table 1 and Fig. 5.

18  
 19 **Table 1: Infiltration score within the Geological Controls on Infiltration GB dataset (V7) and their relevance to the**  
 20 **potential debris flow occurrence.**

| Score | Description                                               | Relevance                                                                                                                                                                                                     | Reclassified score |
|-------|-----------------------------------------------------------|---------------------------------------------------------------------------------------------------------------------------------------------------------------------------------------------------------------|--------------------|
| 1     | The subsurface is likely to be free draining              | The infiltration conditions are such that, depending on the presence or not of other determining factors (e.g. slope, characteristics of geological material.) the potential for debris flows is low          | 1                  |
| 2     | The subsurface is likely to have highly variable drainage | The infiltration conditions are such that, depending on the presence or not of other determining factors (e.g. slope, characteristics of geological material etc.) the potential for debris flows is moderate | 5                  |
| 3     | The subsurface is likely to be poorly draining            | The infiltration conditions are such that, depending on the presence or not of other determining factors (e.g. slope, characteristics of geological material etc.) the potential for debris flows is high     | 10                 |

21



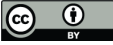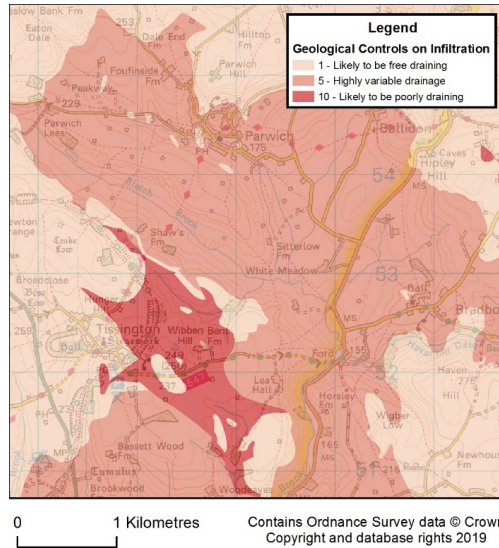

1  
2

3 **Figure 5: Excerpt of the reclassified Geological Controls on Infiltration dataset.**

4 **2.2.3 Slope angle and proximity of stream channels**

5 A key control on debris flow initiation is slope angle. Debris flows generally have a minimum limiting angle  
 6 of around 30° but can be initiated on gully floors on slopes as low as 15 - 20° (Innes 1983). Ballantyne (2004)  
 7 states that “*surveyed hillslope flows in Scotland have source areas on slopes of 30 - 46°, with most starting on*  
 8 *gradients of 32 - 42°*”. This range concurs with other published studies on debris flow initiation (Ballantyne 2004,  
 9 Innes 1983, Milne 2008, Winter et al. 2005). Innes (1983) and Milne (2008) observe that channelised debris flows  
 10 can initiate on lower angle slopes and, as such, channelised debris flows should be modelled differently to open  
 11 hillslope debris flows. Furthermore, Heald and Parsons (2005) and Innes (1983) identify that the maximum slope  
 12 angle for debris flow initiation is between 46 - 50°, since above this gradient, debris can no longer accumulate.  
 13 Using the information acquired in previous studies and observations, Table 2 indicates the scores assigned to each  
 14 slope angle category. Scores assigned to slopes overlaying a stream channel were increased by a factor of two in  
 15 the 20 - 30° and 15 - 20° categories to denote their higher potential for debris flow initiation than open hillslopes  
 16 with equal gradients. To obtain the slope angle and stream channel network a 50 m Digital Terrain Model (DTM)  
 17 derived from the NEXTMap™ data was used. Flow direction, flow accumulation and network were modelled  
 18 using the archyrdo tool in ArcGIS ESRI. An excerpt of the slope dataset (with stream channels) and the associated  
 19 scores are shown in Table 2 and Fig. 6 respectively.

20 **Table 2: Scores assigned to slope angle. Score increased to 16 or 28 if slope angle located within a stream channel.**

| Slope angle (°) | 0-3 | 3-15 | 15-20          | 20-30          | 30-32 | 32-42 | 43-46 | 46-50 | >50 |
|-----------------|-----|------|----------------|----------------|-------|-------|-------|-------|-----|
| Score           | 0   | 2    | <sup>1</sup> 4 | <sup>2</sup> 6 | 8     | 10    | 8     | 6     | 2   |

21  
22

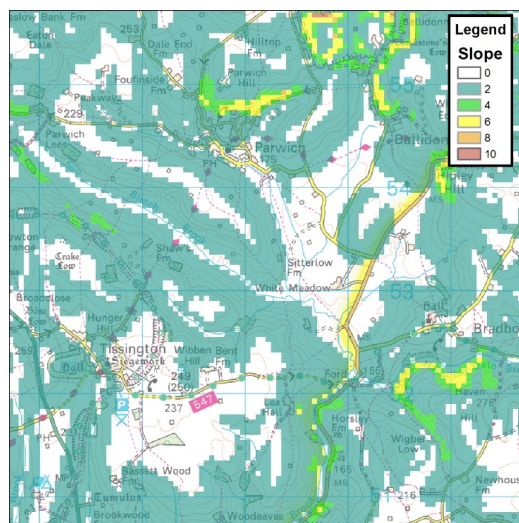

1

2

3 **Figure 6: Excerpt of the slope dataset Slope categorisation dataset with stream channels, derived from the NEXTMap**  
4 **Britain elevation data from Intermap Technologies. Categorised scores as shown in Table 2.**

5 The NEXTMap™ Britain data that was used in the slope and channel assessment is an elevation product  
6 generated by Intermap Technologies in 2005 using an X-band interferometric synthetic aperture radar system  
7 (IFSAR) mounted on an airborne platform. The original Digital Elevation Model (DEM) contains all artefact  
8 features such as buildings and wooded areas. The algorithms that were employed to produce the Digital Terrain  
9 Model (DTM) were generally very effective. However, some areas of woodland, particularly those on slopes, are  
10 identified as areas of higher declivity than in reality, and thus negatively influence the modelling output at those  
11 locations. The same applies to steep sided edges of quarries and coastal features (Fig. 7). Although these issues  
12 result in localised modelling errors, the NEXTMap™ DTM is considered to be, in general, an accurate dataset.  
13 Most importantly, it provided a continuous coverage of Great Britain and was deemed to have the best available  
14 and accessible data at the time of production.

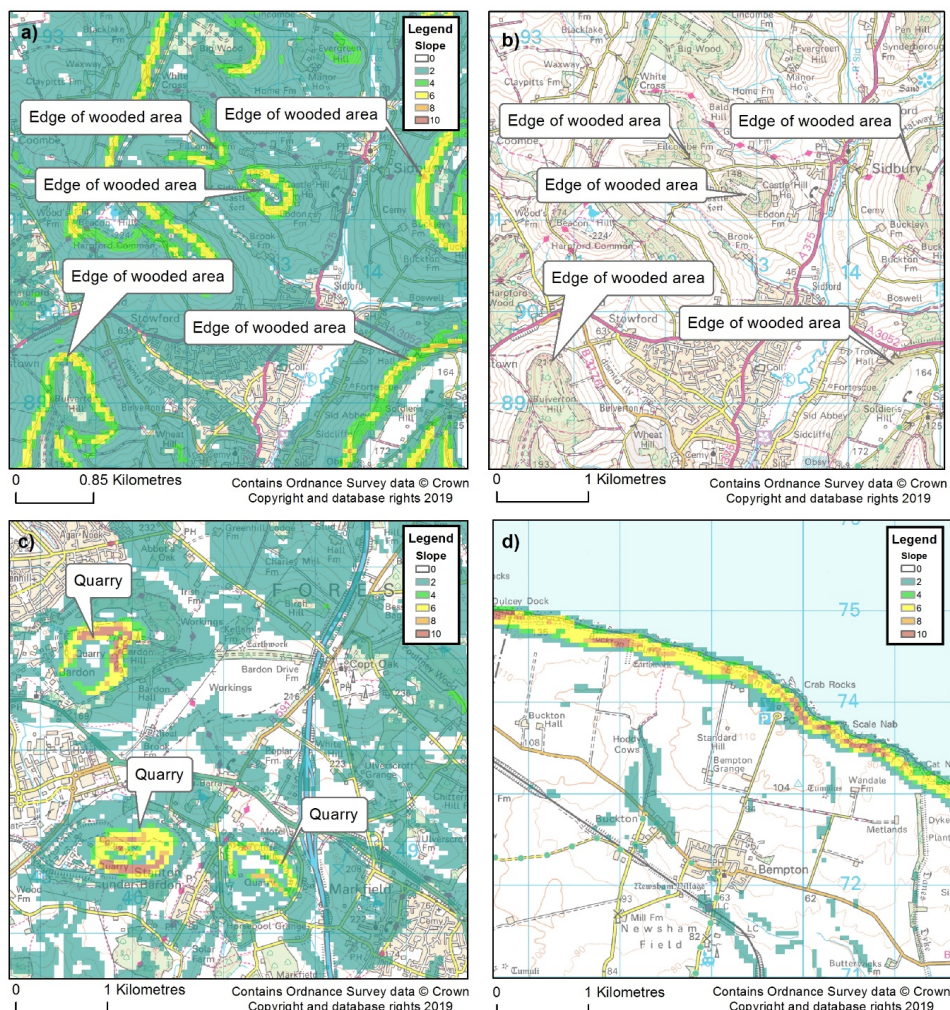

1  
2 **Figure 7: Slope categorisation dataset, derived from the NEXTMap Britain elevation data from Intermap**  
3 **Technologies, indicating modelling artefacts. Upper figures (a and b) highlight the effect of wooded areas; lower figures**  
4 **(c and d) indicate slopes associated with quarrying and coastal features.**

#### 5 2.2.4 Glacial Scouring

6 According to Ballantyne (2004), debris flows are scarce in areas of extensive glacial scouring such as the  
7 Outer Hebrides, Knoydart, Morven and Argyll. This observation is supported by the analysis of the  
8 aforementioned debris flow inventory created for model validation. The dataset didn't contain any recorded debris  
9 flows in areas of extensive glacial scouring (Fig. 8b).

10

11 In order to reflect the impact of ice scouring on reducing the likelihood of debris flows in affected areas of  
12 North West Scotland, the **BGS Quaternary Domain Map** (Booth et al., 2012) is used (Fig. 8a). Herein, the 'ice-  
13 scoured montane' domain is defined as largely devoid of superficial deposits and having experienced severe,



1 widespread glacial erosion resulting in very thin or non-existent soil with minimal occurrence of deeply weathered  
2 bedrock. It can be expected that in these areas, there is less material available for debris flows to occur. To ensure  
3 that the areal extent of this dataset matched the resolution and extent of the more modern BGS data being included  
4 in the model, aerial imagery interpretation and expert judgment were employed to produce a more spatially and  
5 geologically accurate, rather than cartographic, 'ice-scoured montane' domain output (Fig. 9).

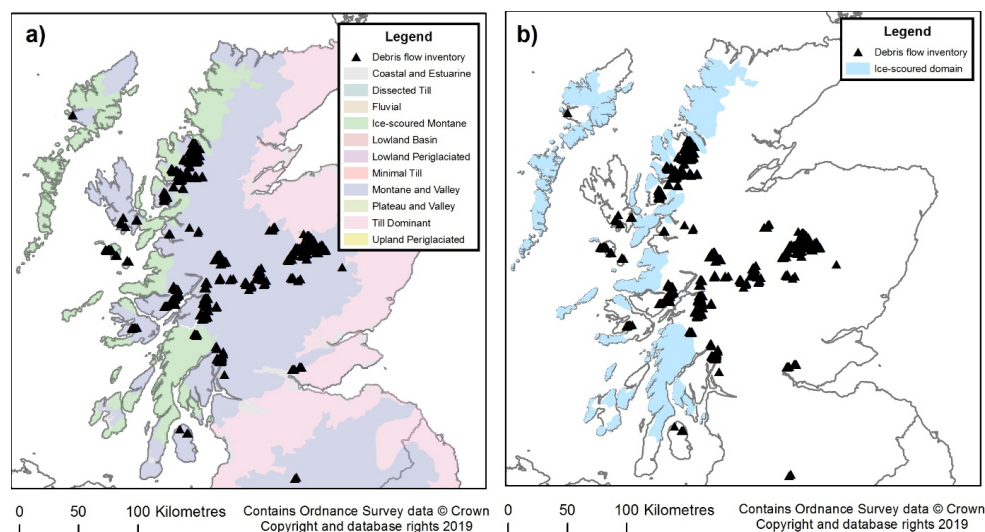

6 0 50 100 Kilometres Contains Ordnance Survey data © Crown  
7 **Figure 8: a) The 'cartographic' BGS Quaternary domains map and debris flow inventory showing the 'ice-scoured**  
8 **montane' domain. b) The revised ice-scoured montane domain map used within the debris flow model.**  
9

### 9 2.3 Model application

10 Having identified, created and classified the datasets that reflect the geological and morphological factors  
11 increasing the likelihood of debris flow occurrence based on a ten-point scoring scale, the next step was to combine  
12 them based on their relative importance. Each dataset was converted into raster format using a 50 m cell size and  
13 applying the maximum value rule, whereby the cell's value reflects the maximum value of the data it overlaid,  
14 irrespective of size of coverage within that cell. Expert opinion amongst the team of geologists developing the  
15 model determined 'availability of debris' and 'slope' as the two most important and thus dominant factors, with  
16 geological controls on infiltration being relatively less important for potential debris flow initiation. To convey  
17 this, the model generated a product of the 'availability of debris material' and 'slope' factors and then added the  
18 permeability score (Equation 1). This means that, in order to be assigned a high susceptibility base score, a pixel  
19 must have a high score for availability of debris material as well as slope angle. Where two pixels have the same  
20 multiplied value, the permeability score is used to further differentiate between them (Eq. (1)). Conversely, if,  
21 for example, permeability scored a maximum value without a significant slope or available material score, a debris  
22 flow is unlikely to be initiated.

24 
$$\text{Susceptibility Base Score} = (\text{Debris Material Score} \times \text{Slope Angle Score}) + \text{Permeability Score} \quad (\text{Eq. 1})$$

25



1 Once the debris flow susceptibility base score was determined for each pixel using Equation 1, the ice scoured  
 2 montane domain mask was applied to the resulting map. The values of those pixels within the ice scoured montane  
 3 domain were divided by three to reduce their influence in the overall model; this value was selected after some  
 4 trial and error and comparison against known areas of debris flow occurrence. Table 3 indicates the categories  
 5 used to classify the final debris flow susceptibility scores into five classes, A to E, and their associated description.  
 6 In order to define the class boundaries, two experts independently assigned boundaries by assessing all possible  
 7 combinations produced by the components (parent material, slope and permeability) and their scorings (1-10).  
 8 They then came together to discuss the decisions that they had made and using scenarios (i.e. thinking about where  
 9 you might find a location where the potential for the parent material to fail was scored as 4, but slope was a 10  
 10 and permeability was a 10) came to a consensus on where the final A-E class boundaries should be placed.

11  
 12 **Table 3: Final debris flow susceptibility classes scoring and description.**

| Score      | Legend | Interpretation                                                                                                                                                                                                                                | Description                                                    |
|------------|--------|-----------------------------------------------------------------------------------------------------------------------------------------------------------------------------------------------------------------------------------------------|----------------------------------------------------------------|
| 0 - 10.99  | A      | Debris flows are not thought to occur. This is due to a lack of available slope materials, high drainage rates or low slope angle.                                                                                                            | Debris flows are not thought to occur                          |
| 11 - 32.99 | B      | Debris flows are not likely to occur. This is either due to a limited availability slope materials, sufficient drainage rates or low slope angles.                                                                                            | Debris flows are not likely to occur                           |
| 33 - 49.99 | C      | Debris flows may be present or anticipated. The combinations of increasing slope angle, poor drainage condition and the presence of available material may increase the potential for failures to occur.                                      | Debris flows may be present or anticipated                     |
| 50 - 64.99 | D      | Debris flows are probably present or have occurred in the past. The combinations of steep slopes, poor drainage conditions and an increased presence of available material suggest that debris flows are likely to be present at these sites. | Debris flows are probably present or have occurred in the past |
| 65 - 110   | E      | Debris flows are highly likely to be present. The heightened combinations of steep slopes, poor drainage conditions and the presence of available material suggest that debris flows are highly likely to be present at these sites.          | Debris flows are highly likely to be present                   |

13 **3 Results and discussion**

14 The resultant debris flow susceptibility map for Great Britain (Fig. 9) is a 50 m raster based GIS dataset which  
 15 provides information on the potential for debris flow initiation at a given location (Bee et al. 2017a and Bee et al.  
 16 2017b). The susceptibility model is classified in a five-point scale from A (i.e. debris flows are not thought to  
 17 occur) to E (i.e. debris flows are highly likely to be present) and covers Great Britain, but excludes the Isle of  
 18 Man, the Channel Islands and Northern Ireland. Table 4 shows how the model compares against all debris flow  
 19 points registered in the inventory. Over 90 % of the recorded debris flows occurred within categories D and E,  
 20 that is, areas with the highest potential for instability. However, approximately 6 % of the mapped debris flows  
 21 were attributed to category A or B, which, according to the model, would have suggested that debris flows are  
 22 unlikely or not thought to occur.

23  
 24



1 **Table 4: Comparison of debris flow model for Great Britain (v6.0) against mapped debris flow occurrences (n = 2087).**

| Susceptibility class | Number of observed debris flows | % of observed debris flows |
|----------------------|---------------------------------|----------------------------|
| A                    | 1                               | 0.05                       |
| B                    | 124                             | 5.94                       |
| C                    | 79                              | 3.79                       |
| D                    | 326                             | 15.62                      |
| E                    | 1557                            | 74.60                      |

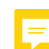

2  
3

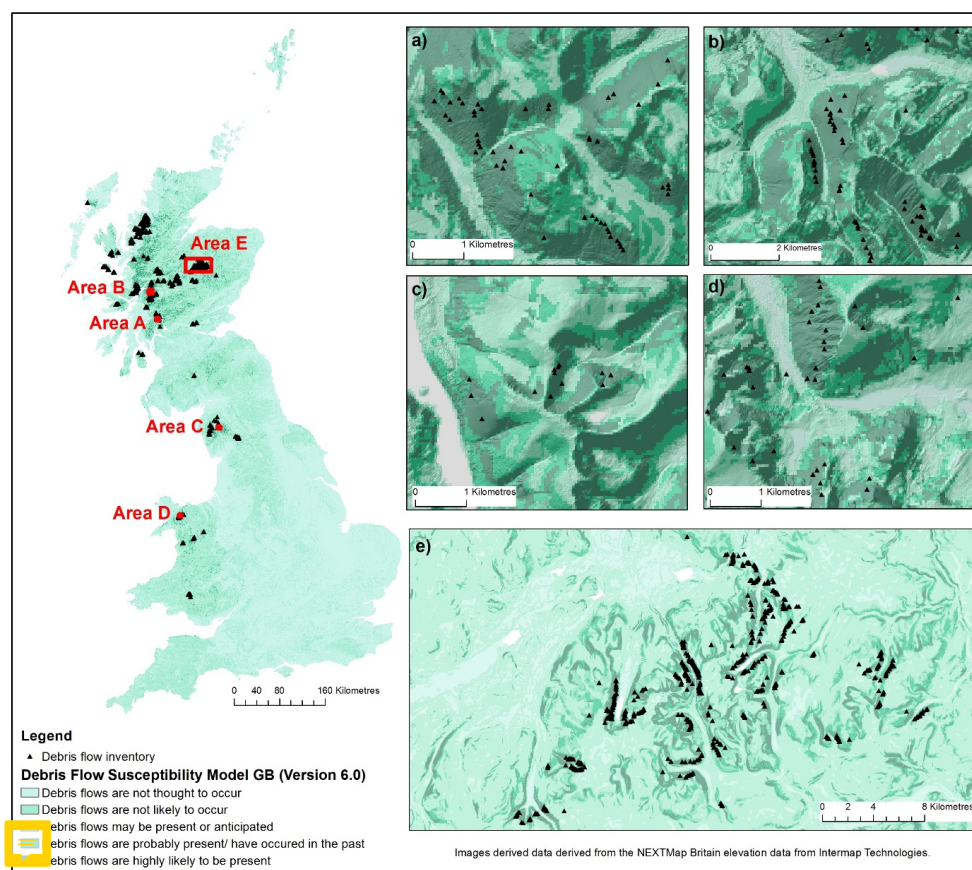

4  
5  
6  
7  
8  
9

**Figure 9: The debris flow susceptibility model for Great Britain (V6.0). a): Rest and Be Thankful area, Scotland. b): Glen Coe, Scotland. c): Lake District, England. d): Snowdonia, Wales. e): validation area in the Cairngorm Mountains, Scotland.**

10 To better assess the model performance, a representative area for debris flow occurrence in the Cairngorm  
 11 Mountains area (817 km<sup>2</sup>, with 33 % of the total number of mapped debris flows), was selected for the calculation  
 12 of the frequency ratio plot and Receiver Operating Characteristics (ROC) curve. The results are illustrated in Fig.  
 13 10. The model satisfies two decision rules considered by Can et al. (2005): (1) most of the observed landslides are  
 14 found in the high-susceptibility class, and (2) the high susceptibility class covers as small an area as possible in



1 the prepared susceptibility map (Table 5). Compared with the overall results, the percentage of debris flows  
2 mapped in classes A and B decreases to 2.89 %, while the percentage of debris flows that occurred within  
3 categories D and E (i.e. areas with the highest potential for instability) increases to 93.50 %.

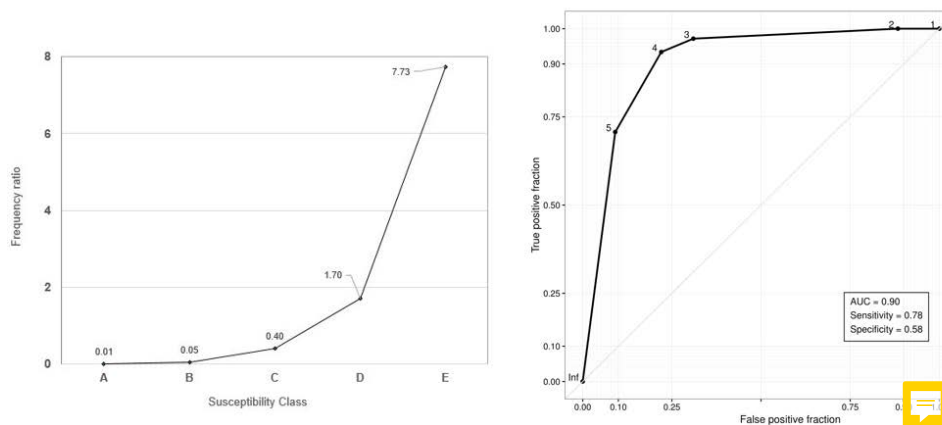

4  
5  
6 **Figure 10: Model validation using frequency ratio plot (left) and ROC curve (right).**

7  
8 **Table 5: Statistics of susceptibility classes (total number of debris flows = 691; validation area of = 871 km<sup>2</sup>).**

| Susceptibility class | No. pixels | % of pixels | No. of debris flows | % of debris flows | Frequency ratio |
|----------------------|------------|-------------|---------------------|-------------------|-----------------|
| A                    | 37917      | 11.60       | 1                   | 0.14              | 0.01            |
| B                    | 187170     | 57.25       | 19                  | 2.75              | 0.05            |
| C                    | 29363      | 8.98        | 25                  | 3.62              | 0.40            |
| D                    | 42285      | 12.93       | 152                 | 22.00             | 1.70            |
| E                    | 30225      | 9.24        | 494                 | 71.49             | 7.73            |

9  
10 The ROC curve is a tool frequently used in statistical approaches to indicate the general reliability of a  
11 geographical prediction map (Chung and Fabbri 2003, Begueria 2006). Although it cannot reveal the actual  
12 uncertainty of spatial prediction patterns (Vakhshoori and Zare, 2017), it provides a good estimate of the model  
13 accuracy and a common base of comparison between models. The area under the curve (AUC) value of the ROC  
14 curve is 0.90 or 90 % (Fig. 10).

15 Overall, the proposed susceptibility model seems to perform reasonably well, considering the limitations of  
16 the input data and methodological approach. Those areas where debris flows have been observed seem to  
17 correspond well to areas of high susceptibility highlighted by the model. Given the selection of factors and  
18 attributed scoring values derived through expert elicitation, this new model is conservative but less so and more  
19 accurate in parts of England and Wales than the one developed by Harrison et al. (2006).

20 There are, of course, limitations to the proposed approach, for example with the accuracy and completeness  
21 of the inventory being used for validation. One challenge when mapping initiation areas using points is the  
22 mismatch between the scale of the process and the model's spatial resolution. As a result, areas adjacent to the



1 mapped initiation point are not taken into account for model validation. One solution to overcome this problem is  
2 to map the initiation area using polygons.

3 Another source of errors stemming from the input data is the presence of artefacts in the DTM model (Fig. 7).  
4 It is recognised that the NEXTMap™ elevation model does not always accurately represent the ground surface  
5 and produces erroneous elevation data in given locations. This occurs because of the oblique way in which  
6 NEXTMap™ data are collected. Examples of this include the coast, verges of dense stands of trees and large  
7 structures such as warehouses or extensive stretches of seawall. As a result, debris flow susceptibility values are  
8 therefore likely to be overestimated in these areas. In addition to the artefacts, the spatial resolution of the DTM  
9 was resampled to a coarser resolution (from 5 m to 50 m) to ensure consistency between spatial datasets. For this  
10 reason, the model is not able to reproduce the detailed morphology that could potentially result in a more accurate  
11 model. However, a finer resolution national scale DTM is expected to be available to BGS in the near future and  
12 its effect on the current modelling results will be assessed.

13 Although heuristic methods introduce uncertainty in model parameters and outputs, similar approaches were  
14 used at the national scale in other study areas and they suggested that, for the most part, the results were  
15 reproducible. For this study, the heuristic approach was deemed to be the most appropriate for the scale of analysis,  
16 data availability and efficient use of peer reviewed studies, expert geologists and geomorphologists at BGS. Such  
17 models offer useful insights to national infrastructure companies when prioritising remediation work to increase  
18 infrastructure resilience from the threat of such hazards.

#### 19 4 Conclusions

20 The debris flow susceptibility model for Great Britain is a 50 m raster based GIS dataset which provides  
21 information on the potential of the ground, at a given location, to form a debris flow based on a five point scale  
22 from A (debris flows are not thought to occur) to E (debris flows are highly likely to be present). The Model used  
23 expert judgement to combine and weight the relevance of four input factors i.e. the properties and characteristics  
24 of geological materials, slope, influence of stream channels and drainage as the indicators of susceptibility. Those  
25 areas where debris flows have been observed (and recorded in the debris flow inventory) correspond well to areas  
26 of high susceptibility highlighted by the model, with 74 % of recorded debris flows occurring within a category  
27 D or E pixel within the model. The validation results showed that the debris flow susceptibility map satisfies the  
28 decision rules proposed by Can et al. (2005). The ROC curve and frequency plot results support the idea that the  
29 model discriminates reasonably well between areas with potential for landsliding (AUC of 0.90 or a prediction  
30 rate equal to 90 %).

31 Although not without some limitations, the debris flow susceptibility model for Great Britain has built on  
32 knowledge by Harrison et al. (2006), refining the model and extending its coverage. As such it represents a useful  
33 tool for policy-makers, developers and engineers, and can support regional or national scale development action  
34 plans and disaster risk reduction strategies at the national scale.





1 **Data availability**

2 The Debris Flow Susceptibility Model for Great Britain (BGS 2017) and the geological data used to produce this  
3 dataset are available under licence from the British Geological Survey. Please contact [enquiries@bgs.ac.uk](mailto:enquiries@bgs.ac.uk) for  
4 further information.

5 **Author contributions**

6 EB was responsible for leading the debris flow product development, including funding acquisition,  
7 conceptualization, investigation, data curation, formal analysis, methodology development and providing  
8 technical expertise to develop the product in GIS. She also the lead in writing this manuscript. CD and CP were  
9 responsible for conceptualization, investigation, formal analysis, methodology development and providing  
10 scientific expertise to underpin development of the product in GIS. They also helped write the manuscript. RC  
11 was responsible for statistical validation of the product, reviewing the methodology and reviewing and editing the  
12 manuscript, including writing original text within the validation section. KL supported the research in a  
13 supervisory capacity, providing consultative geological expertise during model development. All authors  
14 discussed the results and contributed to the final manuscript.

15 **Competing interests**

16 The authors declare that they have no conflicts of interest.

17 **Acknowledgements**

18 This research was supported by the British Geological Survey's National Capability (NC) funding stream received  
19 from the Natural Environment Research Council (NERC) through UK Research and Innovation (UKRI). The  
20 authors publish this article with the permission of the Executive Director, British Geological Survey (BGS). We  
21 would like to acknowledge the support of a number of colleagues in the production and editing of this paper and  
22 its underpinning research, namely, Katy Freeborough, Katy Mee, Catherine Cripps, Russell Lawley, David  
23 Entwistle, Vanessa Banks, Geraldine Wildman, Katherine Royse and Helen Reeves. Whilst every effort has been  
24 made to ensure the accuracy of the material in this paper, the authors will not be liable for any loss or damages  
25 incurred through the use of this paper.

26 **References**

- 27 Ballantyne, C. K.: Geomorphological changes and trends in Scotland: debris-flows. Scottish Natural Heritage 052.  
28 2004.
- 29 Bee, E. J., Pennington, C.V.L., Dashwood, C. and Lee, K. A user guide for the GeoSure Extra, Debris Flow  
30 Susceptibility Model for Great Britain (Version 6.0). British Geological Survey (BGS) OR/17/031, British  
31 Geological Survey, 14pp. 2017a.



- 1 Bee, E. J., Dashwood, C., Pennington, C. V. L., and Lee, K.: GeoSure Extra: Debris Flow Susceptibility Model  
2 for Great Britain (version 6.0) dataset. British Geological Survey. DOI 10.5285/6f46c720-cab3-4c2e-8dad-  
3 8bd2f8f1b4ae. 2017b.
- 4 Begueria, S.: Validation and evaluation of predictive models in hazard assessment and risk management, *Natural*  
5 *Hazards*, 37, 315 – 329. 2006.
- 6 Blais-Stevens, A. and Behnia, P.: Debris flow susceptibility mapping using a qualitative heuristic method and  
7 Flow-R along the Yukon Alaska Highway Corridor, Canada. *Natural Hazards and Earth System Sciences*, 16  
8 (2), 449-462. 2016.
- 9 Blahut, J., Horton, P., Sterlacchini, S., Jaboyedoff, M.: Debris flow hazard modelling on medium scale: Valtellina  
10 di Tirano, Italy, *Nat Hazard Earth Sys*, 10, 2379-2390. 2010.
- 11 Booth, K.A., Booth, S.J., Slater, C.: BGS Geological Cross Section & Quaternary Domains: User Guidance Notes,  
12 British Geological Survey Internal Report, OR/10/030, 36pp. 2012.
- 13 British Geological Survey (BGS): Rest and Be Thankful (A83) Landslide, 2009 [online]. British Geological  
14 Survey. Available at: [https://www.bgs.ac.uk/landslides/RABT\\_2009.html](https://www.bgs.ac.uk/landslides/RABT_2009.html). Last access: 04 January 2019.  
15 2009.
- 16 British Geological Survey (BGS): Ston Coire Sgriodain landslide, 2012, Scottish Highlands [online]. Available  
17 at: <http://www.bgs.ac.uk/landslides/tulloch.html>. Last access: 04 January 2019. 2012.
- 18 Can, T., Nefeslioglu, H.A., Gokgeoglu, C., Sonmez, H. and Duman, T.Y.: Susceptibility assessment of shallow  
19 earth flows triggered by heavy rainfall at three catchments by logistic regression analyses, *Geomorphology*,  
20 72, 250 – 271. 2005.
- 21 Carrara, A., Crosta, G. and Frattini, P.: Comparing models of debris-flow susceptibility in the alpine environment,  
22 *Geomorphology*, 94, 353 – 378. 2008.
- 23 Chung, C.J.F. and Fabbri, A.G.: Validation of spatial prediction models for landslide hazards mapping, *Natural*  
24 *Hazards*, 30, 451 – 472. 2003.
- 25 Cruden, D and Varnes, D.: Landslide types and processes. National Research Council, Washington DC, 247, 36-  
26 75 pp., 1996.
- 27 Dearden, R.: User guide for infiltration SuDS Map: detailed. British Geological Survey, OR/16/009. 2016.
- 28 Dearden, R. A., Marchant, A. and Royse, K. Development of a suitability map for infiltration sustainable drainage  
29 systems (SuDS). *Environmental Earth Sciences*, 70(6), 2587-2602. 2013.
- 30 Department for Communities and Local Government. National Planning Policy Framework. England. 2012.
- 31 Department of the Environment. Planning Policy Guidance 14: Development on Unstable Land. 1990.
- 32 Fell, R., Corominas, J., Bonnard, C., Cascini, L., Leroi, E. and Savage, W.Z. Guidelines for landslide  
33 susceptibility, hazard and risk zoning for land use planning, . *Engineering Geology*, 102, 85 - 98. 2008.
- 34 Harrison, M., Gibson, A. Forster, A., Entwistle, D. and Wildman, G. Scottish Road Network Landslide Study:  
35 Methodology used to generate Debris Flow Potential Using Geographical Information Systems (GIS). British  
36 Geological Survey confidential report. Extracts available at:  
37 [https://www.transport.gov.scot/publication/scottish-road-network-landslides-study-implementation/j10107-  
38 07/](https://www.transport.gov.scot/publication/scottish-road-network-landslides-study-implementation/j10107-07/). Last access: 12 December 2018. 2006.
- 39 Heald, A. P. and Parsons, J. Introduction to landslide hazards. In: Winter, M. G., Macgregor, F. and Shackman,  
40 L. eds. Scottish Road Network Landslides Study. Edinburgh: Scottish Executive. 2005.



- 1 Hungr, O., Leroueil, S. and Picarelli, L. The Varnes classification of landslide types, an update. *Landslides*, 11(2),  
2 167-194. 2014.
- 3 Hürlimann, M., Rickenmann, D., Medina, V. and Bateman, A. Evaluation of approaches to calculate debris-flow  
4 parameters for hazard assessment. *Engineering Geology*, 102(3-4), 152-163. 2008.
- 5 Innes, J. L. Debris flows. *Progress in Physical Geography*, 7(4), 469-501. 1983.
- 6 Iovine, G., Di Gregorio, S. and Lupiano, V. Debris-flow susceptibility assessment through cellular automata  
7 modeling: an example from 15–16 December 1999 disaster at Cervinara and San Martino Valle Caudina  
8 (Campania, southern Italy), *Natural Hazards and Earth System Sciences*, 3, 457 – 468. 2003.
- 9 Jakob, M. Debris-flow hazard analysis. In: Jakob, M. and Hungr, O. eds. *Debris-flow hazards and related*  
10 *phenomena*. Springer. 2005.
- 11 Jones, D. and Lee, E. M., 1994. *Landsliding in Great Britain*. London: H.M.S.O. 1994.
- 12 Kappes, M. S., Malet, J.-P., Remaitre, A., Horton, P., Jaboyedoff, M., and Bell, R. Assessment of debris flow  
13 susceptibility at medium-scale in the Barcelonnette Basin, France. *Natural Hazards and Earth System*  
14 *Sciences*, European Geosciences Union. 2011.
- 15 Lawley, R., Rawlins, B., Tye, A., Wildman, G. The Soil–Parent Material database: A User Guide. British  
16 Geological Survey Internal Report, OR/08/034, 45pp. 2009.
- 17 Luna, B. Q., Blahut, J., Kappes, M., Akbas, S.O., Malet, J.-P., Remaitre, A., Van Asch, T. and Jaboyedoff, M.  
18 Methods for debris flow hazard and risk assessment. *Mountain risks: from prediction to management and*  
19 *governance*, 133-177. 2013.
- 20 Maccaferri. Debris Flow Barriers - A83 Trunk Road (pt1) (Case History). UK/CH/EP040, available at:  
21 [https://www.maccaferri.com/uk/download/ch-rf-uk-debris-flow-barriers-a83-trunk-road-](https://www.maccaferri.com/uk/download/ch-rf-uk-debris-flow-barriers-a83-trunk-road-part3scotland/?wpdmdl=4963)  
22 [part3scotland/?wpdmdl=4963](https://www.maccaferri.com/uk/download/ch-rf-uk-debris-flow-barriers-a83-trunk-road-part3scotland/?wpdmdl=4963). Last access: 01 March 2019. 2014.
- 23 Mcmillan, P., Brown, D. J., Forster, A. and Winter, M.G. Debris flow information sources. In: *Scottish Road*  
24 *Network Landslides Study* (Eds: Winter, M. G, Macgregor, F. and Shackman, L.). Scottish Executive, pp 25-  
25 44. 2005.
- 26 Mee, K., Bee, E. J. and Lee, K. User guide and methodology for the Geological Controls on Infiltration GB  
27 (Version 7) GIS dataset. British Geological Survey. IR/16/032. 2016.
- 28 Milne, F. D. Topographic material controls of the Scottish debris flow hazard. Doctoral Thesis. University of  
29 Dundee. 2008.
- 30 Milne, F. D. Werritty, A., Davies, M. C. R. and Brown, M. J. A recent debris flow event and implications for  
31 hazard management. *Quarterly Journal of Engineering Geology and Hydrogeology*, 42(1), 51-60. 2009.
- 32 Nettleton, I. M., Martin, S., Hencher, S. and Moore, R. Debris flow types and mechanisms, in: M. G. Winter, F.  
33 MacGregor & L. Shackman (eds) *Scottish Road Network Landslides Study*. 2005.
- 34 Postance B.F., Hilier, J.K., Dijkstra, T., and Dixon, N. Extending natural hazard impacts: an assessment of  
35 landslide disruptions on a national road transportation network, *Environmental Research Letters*, 12(1), 1 - 11.  
36 2017.
- 37 Skinner, K. D. Post-fire debris flow hazard assessment of the area burned by the 2013 Beaver Creek fire near  
38 Hailey, Central Idaho. 2013.
- 39 Vakhshoori, V. and Zare, M. Is the ROC curve a reliable tool to compare the validity of landslide susceptibility  
40 maps?, *Geomatics, Natural Hazards and Risk*, 9(1), 249 – 266. 2018.



- 1 Van Westen, C.J. Landslide hazard and risk zonation - why is it still so difficult, *Bulletin of Engineering Geology*
- 2 *and the Environment*, 65, 167 – 184. 2006.
- 3 Winter, M. G., Heald, A.P., Parsons, J.A., Shackman, L. and Macgregor, F. Scottish debris flow events of August
- 4 2004. *Quarterly Journal of Engineering Geology and Hydrogeology*, 39, 73-78. 2006.
- 5 Winter, M. G., Kinnear, N., Shearer, B., Lloyd, L. and Helman, S. A technical and perceptual evaluation of wig-
- 6 wag signs at the A83 Rest and be Thankful. Transport Scotland, PPR664. 2013.
- 7 Winter, M. G., Macgregor, F. and Shackman, L. Scottish Road Network Landslides Study. The Scottish
- 8 Executive. 2005.
- 9 Winter, M. G. and Shearer, B. An extended and updated technical evaluation of wig-wag signs at the A83 Rest
- 10 And Be Thankful. Transport Research Laboratory. 2017.
- 11 Winter, M. G., Smith, J.T., Fotopoulou, S., Pitilakis, K., Mavrouli, O., Corominas, J. and Aegyroudou, S. An expert
- 12 judgement approach to determining the physical vulnerability of roads to debris flow. *Bulletin of Engineering*
- 13 *Geology and the Environment*, 73(2), 291-305. 2014.
